# Supplementary material
Source: ML conference proceedings conference paper supplement (https://openaccess.thecvf.com/content/CVPR2024/html/Chang_Hierarchical_Histogram_Threshold_CVPR_2024_paper.html)
Supplement: Supplementary file 1 [file Chang_Hierarchical_Histogram_Threshold_CVPR_2024_supplemental.pdf]

# Hierarchical Histogram Threshold Segmentation – Auto-terminating High-detail Oversegmentation

## Supplementary Material

### 1. More Visual Results

#### 1.1. Hierarchical Fine-tuning

Fig. 2 shows HHTS segmentation results for four BSDS500 images [2] at different segmentation levels. Due to the iterative split of inhomogeneous segments, homogeneous areas can be maintained while areas with many details will be segmented into smaller superpixels. This allows for capturing tiny and thin image components, even at a relatively low superpixel count. Further iterations (*cf.* higher superpixel count) will extract more subtle object outlines and separate less distinguishable image components. Fig. 1 shows the final HHTS segmentation results after auto-termination while preserving a minimum segment size of 64 pixels.

#### 1.2. Segmentation Results

Fig. 3 shows some more visual results for BSDS500 images that were segmented by HHTS. Many different shapes and types of objects can be detected due to the algorithm’s focus on boundary adherence. This approach can adjust to difficult scenes by taking into account more irregular shaped and less compact superpixels.

#### 1.3. Visual Comparison

A visual comparison of HHTS and oversegmentation methods implemented in Stutz’s *et al.* superpixel benchmark [7] can be found in Fig. 4 and Fig. 5. HHTS achieves to capture more image details than the compared approaches at the same superpixel resolution.

### References

- [1] Radhakrishna Achanta, Appu Shaji, Kevin Smith, Aurelien Lucchi, Pascal Fua, and Sabine Süsstrunk. Slic superpixels compared to state-of-the-art superpixel methods. *IEEE Transactions on Pattern Analysis and Machine Intelligence*, 34(11): 2274–2282, 2012. 4, 5
- [2] Pablo Arbeláez, Michael Maire, Charless Fowlkes, and Jitendra Malik. Contour detection and hierarchical image segmentation. *IEEE Transactions on Pattern Analysis and Machine Intelligence*, 33(5):898–916, 2011. 1, 4, 5
- [3] P. Buysens, M. Toutain, A. Elmoataz, and O. Lezoray. Eikonal-based vertices growing and iterative seeding for efficient graph-based segmentation. In *IEEE International Conference on Image Processing*, 2014. 4, 5
- [4] Michael Van den Bergh, Xavier Boix, Gemma Roig, and Luc Van Gool. SEEDS: Superpixels extracted via energy-driven sampling. *International Journal of Computer Vision*, 111(3):298–314, 2014. 4, 5
- [5] Ming-Yu Liu, Oncel Tuzel, Srikumar Ramalingam, and Rama Chellappa. Entropy rate superpixel segmentation. In *IEEE Conference on Computer Vision and Pattern Recognition*, 2011. 4, 5
- [6] Rudolf Mester, Christian Conrad, and Alvaro Guevara. Multichannel segmentation using contour relaxation: Fast superpixels and temporal propagation. In *Image Analysis*, pages 250–261. 2011. 4, 5
- [7] David Stutz, Alexander Hermans, and Bastian Leibe. Superpixels: An evaluation of the state-of-the-art. *Computer Vision and Image Understanding*, 166:1–27, 2018. 1
- [8] Jian Yao, Marko Boben, Sanja Fidler, and Raquel Urtasun. Real-time coarse-to-fine topologically preserving segmentation. In *IEEE Conference on Computer Vision and Pattern Recognition*, 2015. 4, 5

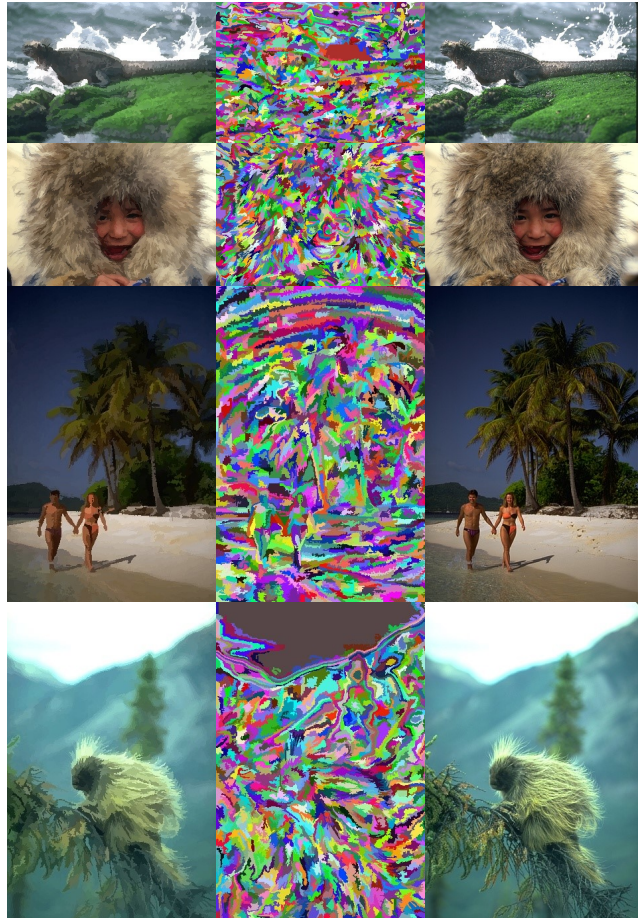

Figure 1. Final HHTS segmentation results (auto-termination at 925 – 996 superpixel) and the original image as reference.

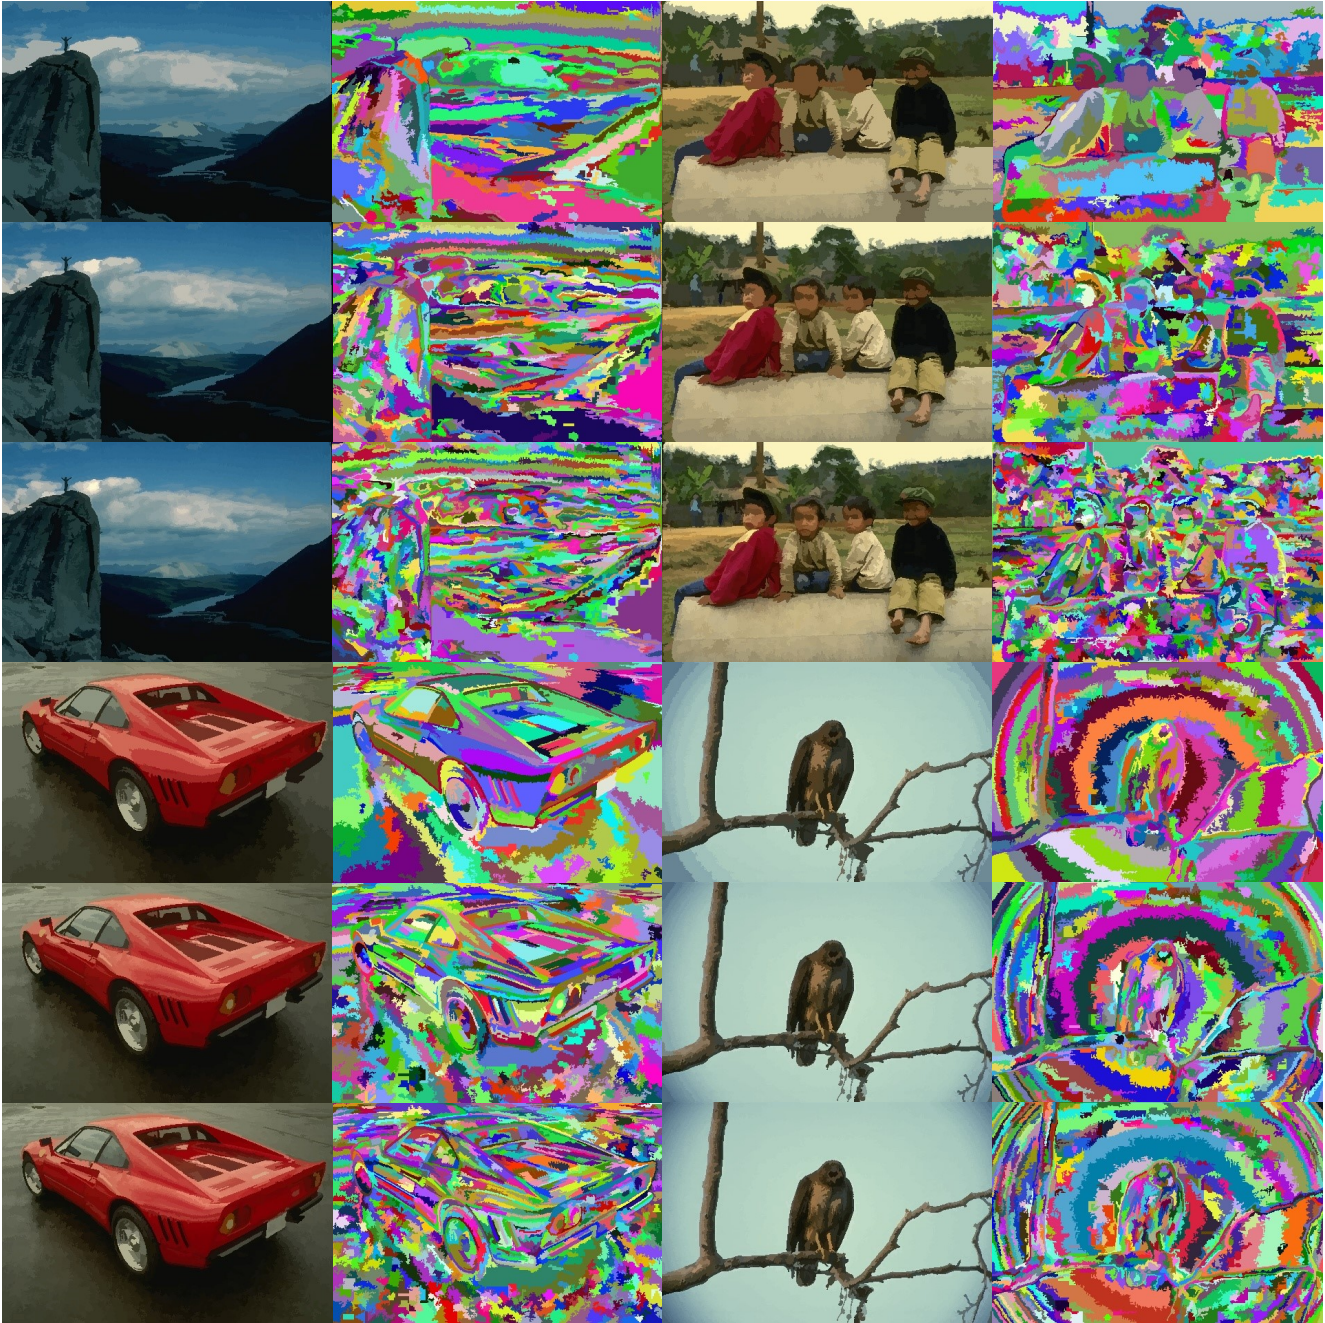

Figure 2. HHTS segmentation results at 250, 500, and 1000 superpixels, adapting to local details while maintaining homogeneous areas.

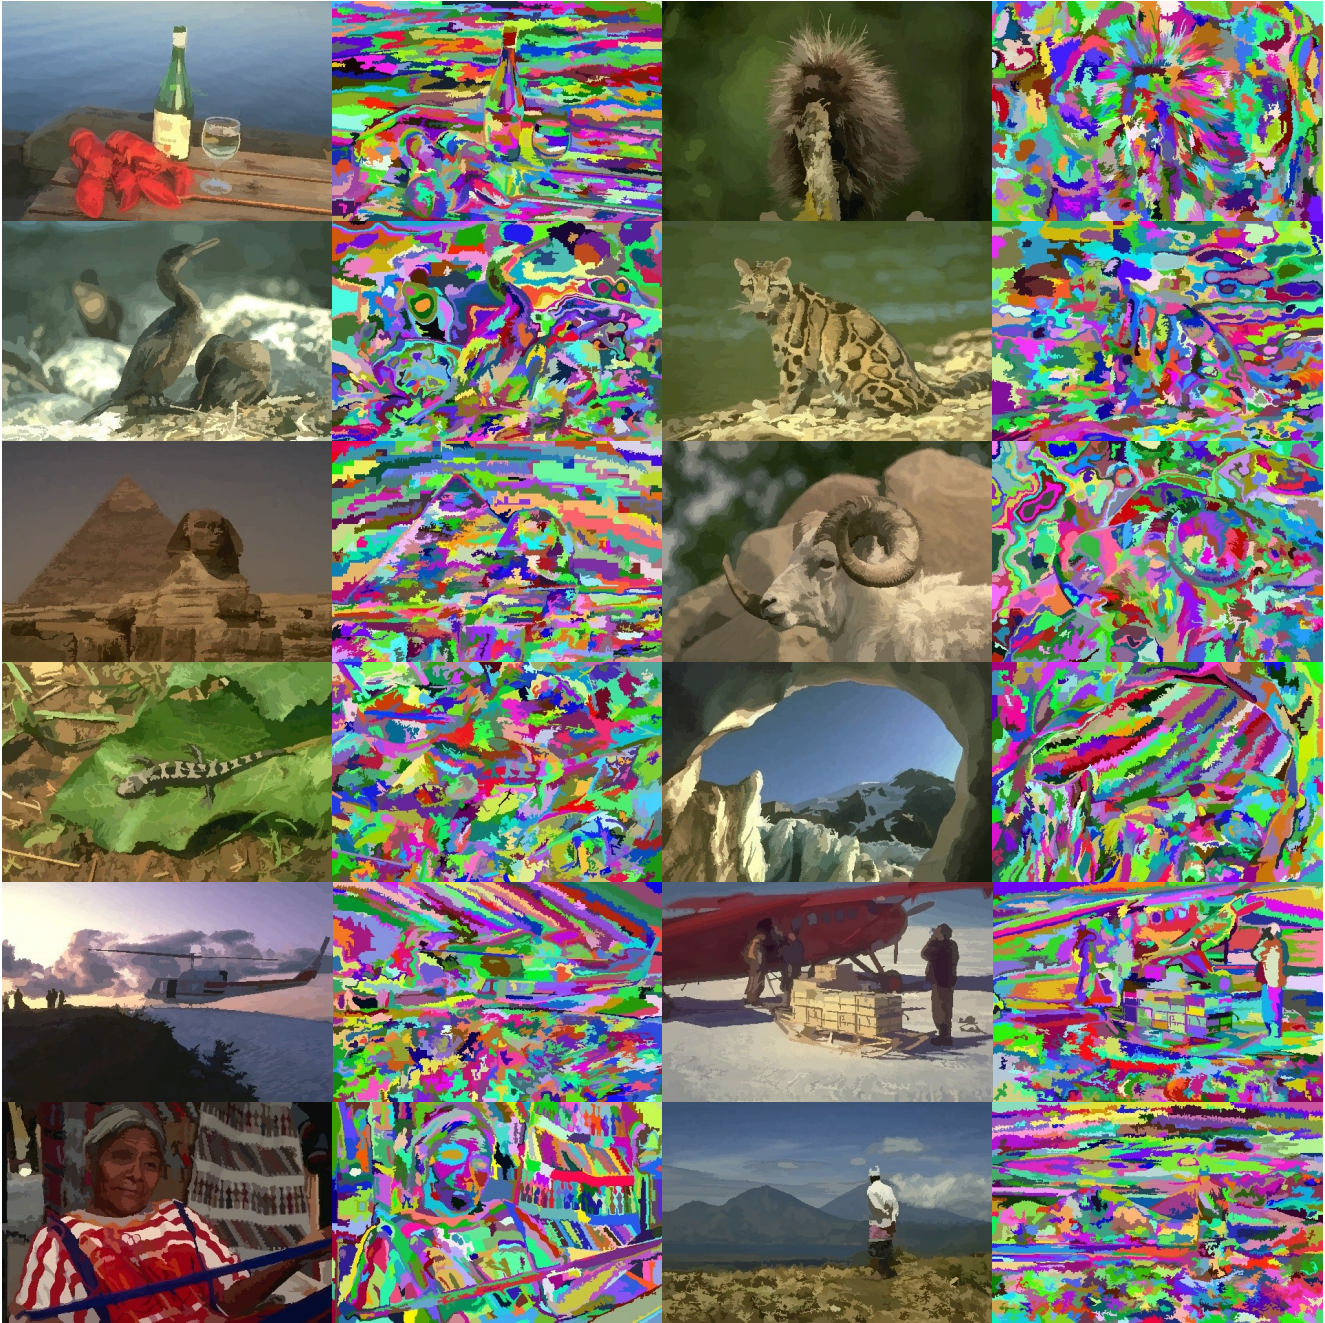

Figure 3. HHTS segmentation results at 500 superpixels.

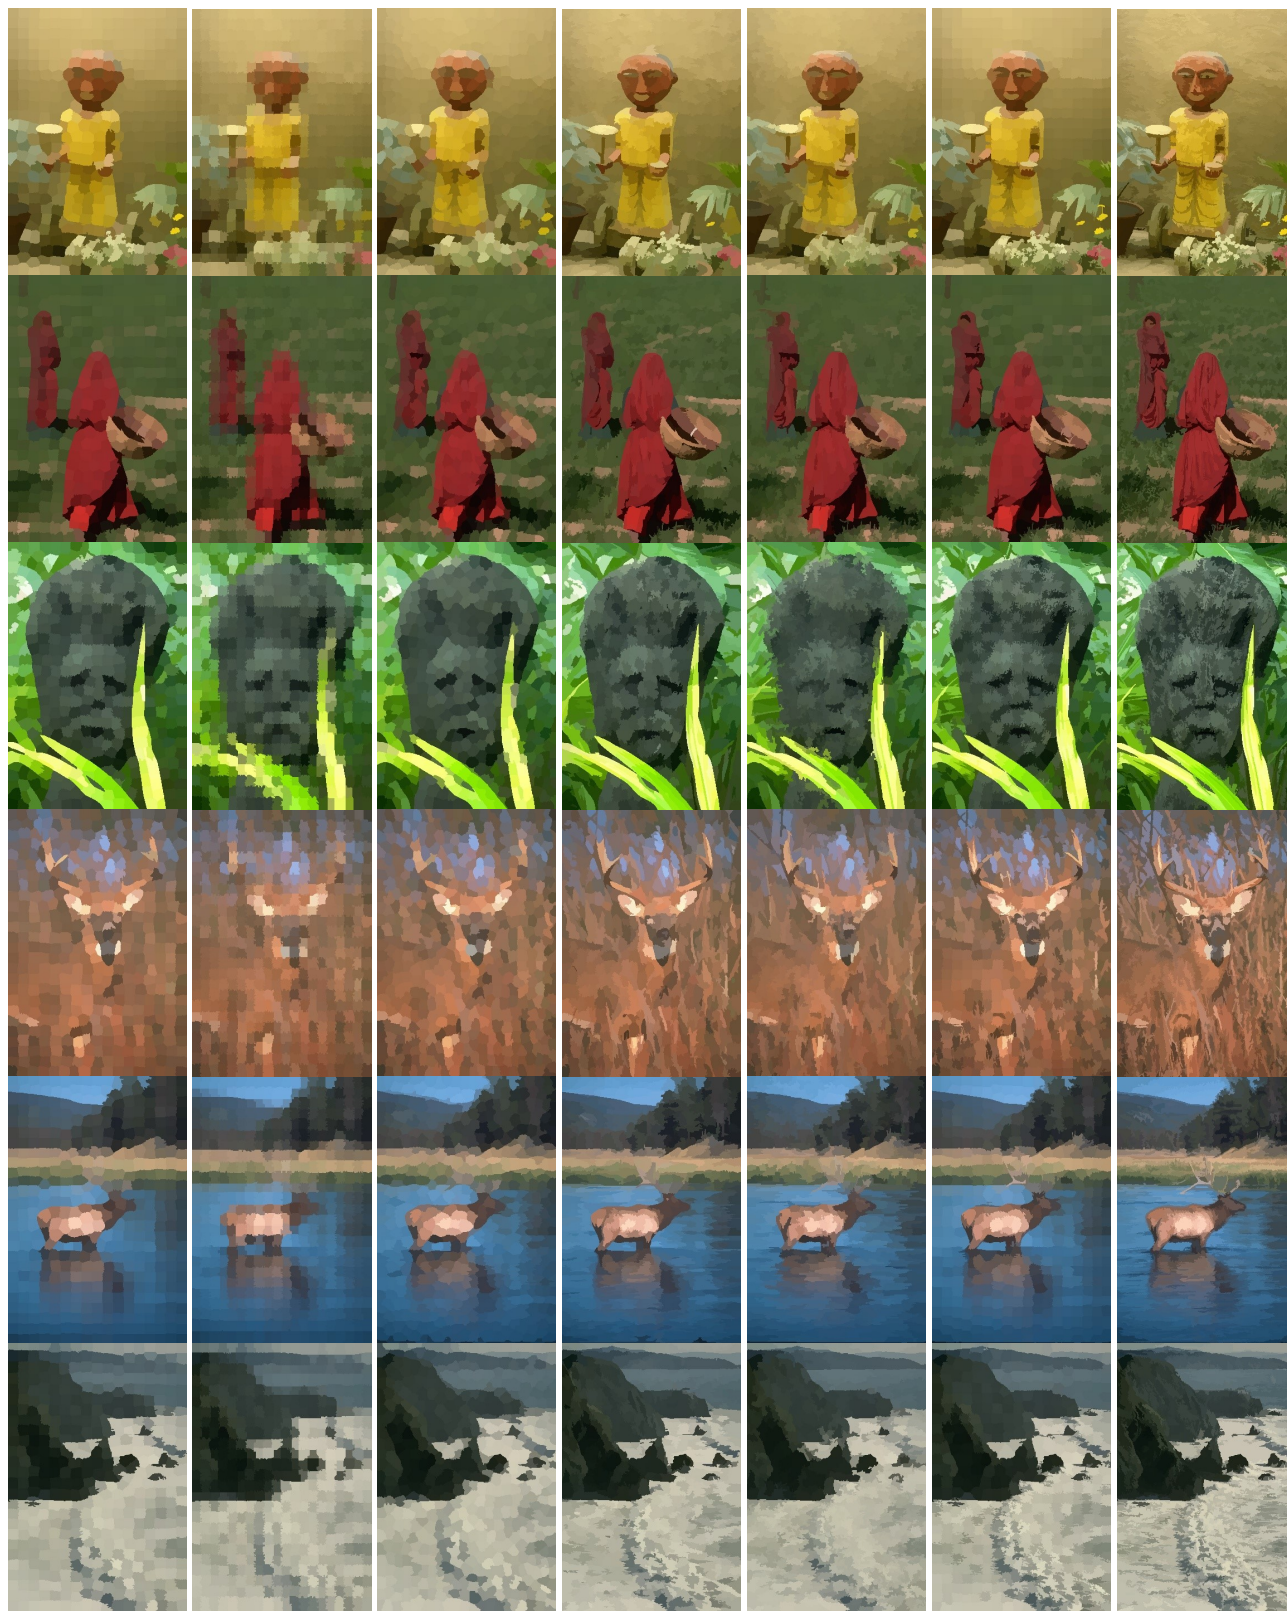

(a) SLIC [1]      (b) SEEDS [4]      (c) CRS [6]      (d) ERGC [3]      (e) ERS [5]      (f) ETPS [8]      (g) HHTS

Figure 4. Visual comparison of mean image segments at 500 superpixels for portrait BSDS500 test images [2]

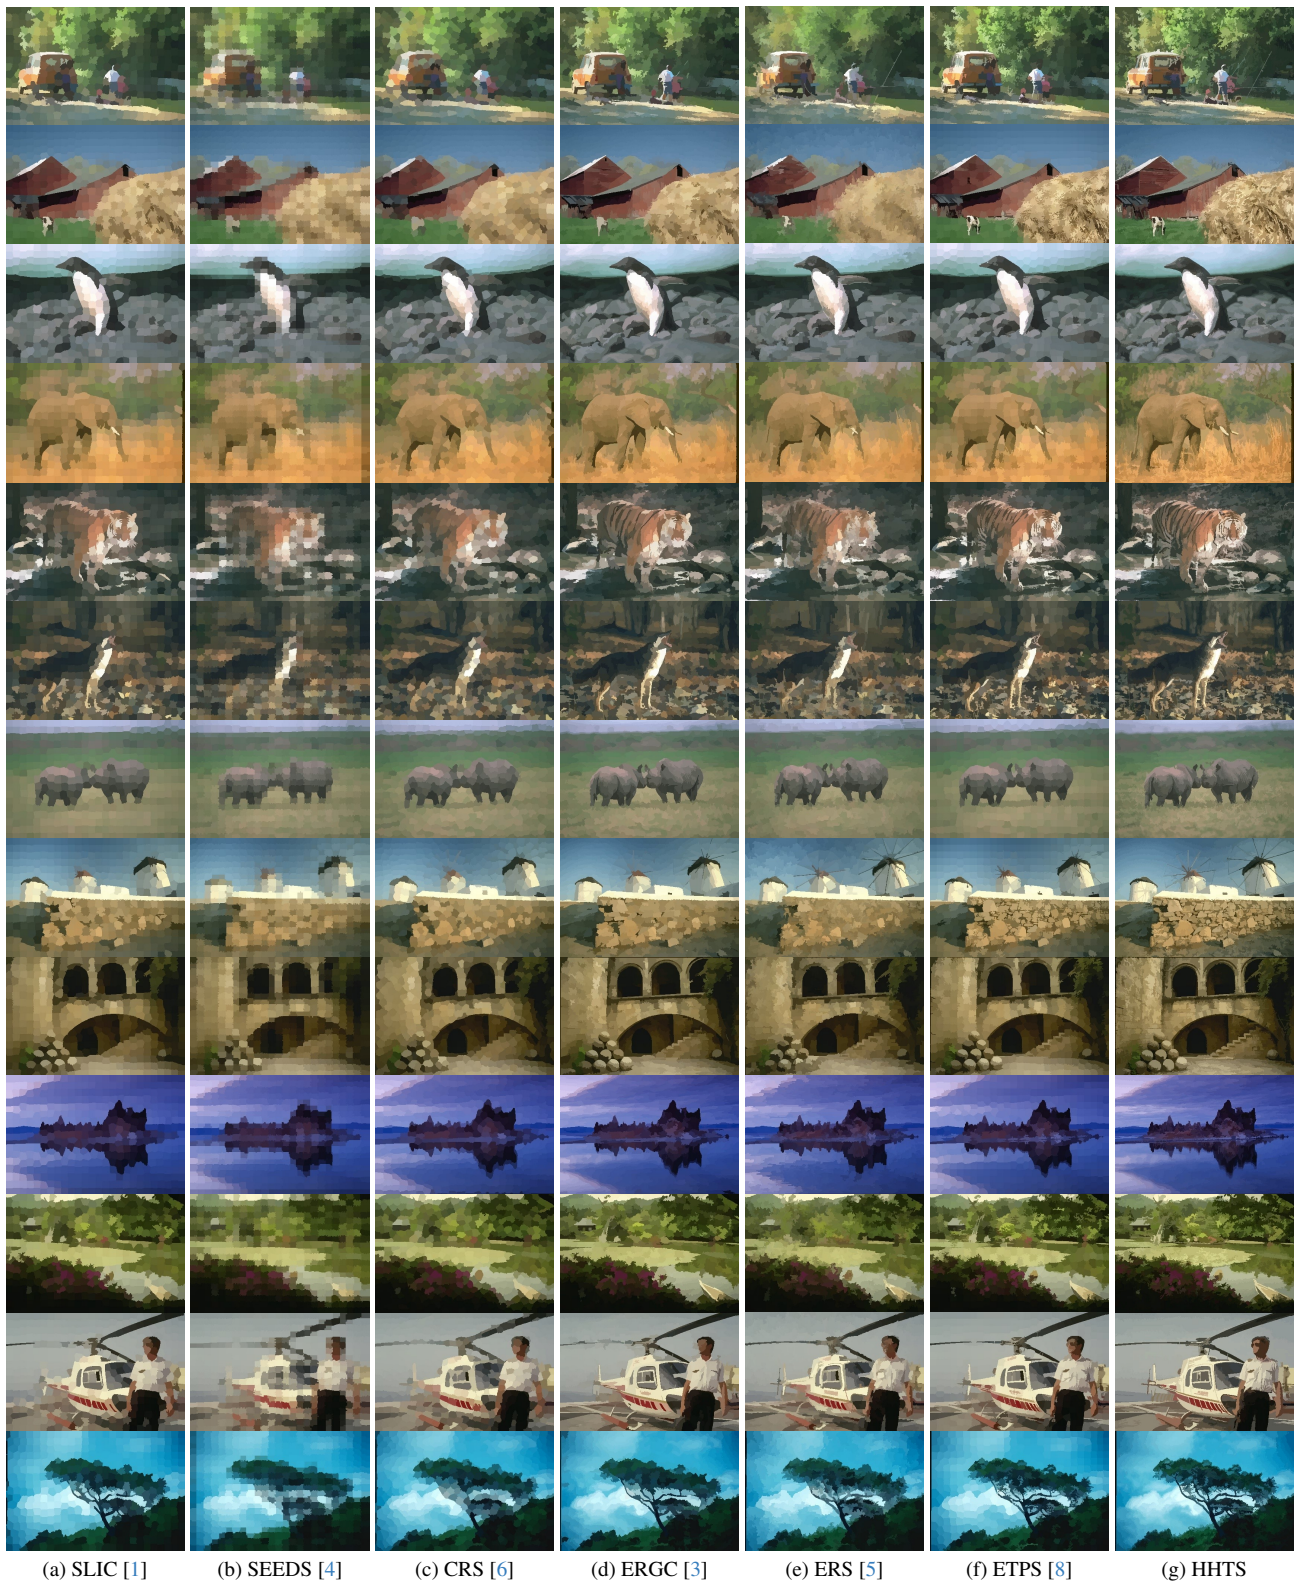

Figure 5. Visual comparison of mean image segments at 500 superpixels for landscape BSDS500 test images [2]
